# Supplementary material for: Epidemiology of Antimicrobial Resistance Genes in Staphyloccocus aureus Isolates from a Public Database in a One Health Perspective—Sample Characteristics and Isolates’ Sources
Source: MDPI journal article supplement (doi:10.3390/antibiotics12071225), 2023-07-24
Supplement: s1 [file s1]

Table S1: drug class resistance, resistance mechanism induced by antibiotic resistance genes and AMR gene family of the genes found in *S. aureus* isolates of NPDIB.

| Gene                          | Drug class                              | Resistance Mechanism                   | AMR gene family                                                           |
|-------------------------------|-----------------------------------------|----------------------------------------|---------------------------------------------------------------------------|
| <i>ant(9)-Ia</i>              | aminoglycoside antibiotic               | antibiotic inactivation                | ANT(9)                                                                    |
| <i>ant(6)-Ia</i>              | aminoglycoside antibiotic               | antibiotic inactivation                | ANT(6)                                                                    |
| <i>aadD1</i>                  | aminoglycoside antibiotic               | antibiotic inactivation                | ANT(4')                                                                   |
| <i>aph(3')-IIa</i>            | aminoglycoside antibiotic               | antibiotic inactivation                | APH(3')                                                                   |
| <i>aac(6')-Ie/aph(2'')-Ia</i> | aminoglycoside antibiotic               | antibiotic inactivation                | aminoglycoside bifunctional resistance protein                            |
| <i>aac(6')-Ie</i>             | aminoglycoside antibiotic               | antibiotic inactivation                | AAC(6')                                                                   |
| <i>aph(2'')-I</i>             | aminoglycoside antibiotic               | antibiotic inactivation                | APH(2'')                                                                  |
| <i>apmA</i>                   | aminoglycoside antibiotic               | antibiotic inactivation                | apm acetyltransferase                                                     |
| <i>spd</i>                    | aminoglycoside antibiotic               | antibiotic inactivation                | ANT(9)                                                                    |
| <i>Abc-f</i>                  | antibiotics targeting protein synthesis | ribosomal antibiotic target protection | ABC-F subfamily ATP-binding cassette ribosomal protection                 |
| <i>dfrG</i>                   | diaminopyrimidine antibiotic            | antibiotic target replacement          | trimethoprim resistant dihydrofolate reductase dfr                        |
| <i>dfrS1</i>                  | diaminopyrimidine antibiotic            | antibiotic target replacement          | trimethoprim resistant dihydrofolate reductase dfr                        |
| <i>dfrB</i>                   | diaminopyrimidine antibiotic            | antibiotic target replacement          | trimethoprim resistant dihydrofolate reductase dfr                        |
| <i>dfrF</i>                   | diaminopyrimidine antibiotic            | antibiotic target replacement          | trimethoprim resistant dihydrofolate reductase dfr                        |
| <i>dfr(K)</i>                 | diaminopyrimidine antibiotic            | antibiotic target replacement          | trimethoprim resistant dihydrofolate reductase dfr                        |
| <i>parC</i>                   | fluoroquinolone antibiotic              | antibiotic target alteration           | fluoroquinolone resistant parC                                            |
| <i>gyrA</i>                   | fluoroquinolone antibiotic              | antibiotic target alteration           | fluoroquinolone resistant gyrA                                            |
| <i>parE</i>                   | fluoroquinolone antibiotic              | antibiotic target alteration           | fluoroquinolone resistant parE                                            |
| <i>fusC</i>                   | fusidane antibiotic                     | antibiotic target protection           | Target protecting FusB-type protein conferring resistance to Fusidic acid |
| <i>fus(A)</i>                 | fusidane antibiotic                     | antibiotic target alteration           | antibiotic resistant fusA                                                 |

|                   |                                                                                                 |                                        |                                                                           |
|-------------------|-------------------------------------------------------------------------------------------------|----------------------------------------|---------------------------------------------------------------------------|
| <i>fusB</i>       | fusidane antibiotic                                                                             | antibiotic target alteration           | Target protecting FusB-type protein conferring resistance to Fusidic acid |
| <i>bleO</i>       | glycopeptide antibiotic                                                                         | antibiotic inactivation                | Bleomycin resistant protein                                               |
| <i>vanA</i>       | glycopeptide antibiotic                                                                         | antibiotic target alteration           | glycopeptide resistance gene cluster, Van ligase                          |
| <i>vanH-A</i>     | glycopeptide antibiotic                                                                         | antibiotic target alteration           | vanH                                                                      |
| <i>vanR-A</i>     | glycopeptide antibiotic                                                                         | antibiotic target alteration           | vanR                                                                      |
| <i>vanS-A</i>     | glycopeptide antibiotic                                                                         | antibiotic target alteration           | vanS                                                                      |
| <i>vanX-A</i>     | glycopeptide antibiotic                                                                         | antibiotic target alteration           | vanX                                                                      |
| <i>vanY-A</i>     | glycopeptide antibiotic                                                                         | antibiotic target alteration           | vanY                                                                      |
| <i>vanZ-A</i>     | glycopeptide antibiotic                                                                         | antibiotic target alteration           | vanZ                                                                      |
| <i>lnu(A)</i>     | lincosamide antibiotic                                                                          | antibiotic inactivation                | lincosamide nucleotidyltransferase (LNU)                                  |
| <i>mph(C)</i>     | macrolide antibiotic                                                                            | antibiotic inactivation                | macrolide phosphotransferase (MPH)                                        |
| <i>mup(A)</i>     | mupirocin-like antibiotic                                                                       | antibiotic target alteration           | antibiotic-resistant isoleucyl-tRNA synthetase (ileS)                     |
| <i>ileS</i>       | mupirocin-like antibiotic                                                                       | antibiotic target alteration           | antibiotic-resistant isoleucyl-tRNA synthetase (ileS)                     |
| <i>sat4</i>       | nucleoside antibiotic                                                                           | antibiotic inactivation                | streptothricin acetyltransferase (SAT)                                    |
| <i>rpIC_G152D</i> | oxalidinone antibiotic                                                                          | ribosomal antibiotic target protection | <i>rplC</i> point mutation                                                |
| <i>cfr</i>        | oxazolidinone antibiotic, lincosamide antibiotic, streptogramin antibiotic, phenicol antibiotic | antibiotic target alteration           | Cfr 23S ribosomal RNA methyltransferase                                   |
| <i>mec C</i>      | penam                                                                                           | antibiotic target replacement          | methicillin resistant PBP2                                                |
| <i>blaI</i>       | penam (penicillins)                                                                             | antibiotic inactivation                | BlaZ beta-lactamase                                                       |
| <i>blaR1</i>      | penam (penicillins)                                                                             | antibiotic inactivation                | BlaZ beta-lactamase                                                       |
| <i>mecA</i>       | penam (penicillins)                                                                             | antibiotic target replacement          | methicillin resistant PBP2                                                |
| <i>blaZ</i>       | penam (penicillins)                                                                             | antibiotic inactivation                | BlaZ beta-lactamase                                                       |
| <i>mecR1</i>      | penam (penicillins)                                                                             | antibiotic target replacement          | methicillin resistant PBP2                                                |
| <i>mecI</i>       | penam (penicillins)                                                                             | antibiotic target replacement          | methicillin resistant PBP2                                                |
| <i>blaPC1</i>     | penam (penicillins)                                                                             | antibiotic inactivation                | BlaZ beta-lactamase                                                       |
| <i>mprF</i>       | peptide antibiotic                                                                              | antibiotic target alteration           | defensin resistant mprF                                                   |
| <i>walK</i>       | peptide antibiotic                                                                              | antibiotic target alteration           | daptomycin resistant walK                                                 |

|               |                                                                                                                                |                                                             |                                                            |
|---------------|--------------------------------------------------------------------------------------------------------------------------------|-------------------------------------------------------------|------------------------------------------------------------|
| <i>fex(A)</i> | phenicol antibiotic                                                                                                            | antibiotic efflux                                           | major facilitator superfamily (MFS) antibiotic efflux pump |
| <i>catA</i>   | phenicol antibiotic                                                                                                            | antibiotic inactivation                                     | chloramphenicol acetyltransferase (CAT)                    |
| <i>cat-TC</i> | phenicol antibiotic                                                                                                            | antibiotic inactivation                                     | chloramphenicol acetyltransferase (CAT)                    |
| <i>fos(B)</i> | phosphonic acid antibiotic                                                                                                     | antibiotic inactivation                                     | fosfomycin thiol transferase                               |
| <i>murA</i>   | phosphonic acid antibiotic                                                                                                     | antibiotic inactivation                                     | antibiotic-resistant murA transferase                      |
| <i>glpT</i>   | phosphonic acid antibiotic                                                                                                     | antibiotic inactivation                                     | antibiotic-resistant glpT                                  |
| <i>fosD</i>   | phosphonic acid antibiotic                                                                                                     | antibiotic inactivation                                     | fosfomycin thiol transferase                               |
| <i>fosY</i>   | phosphonic acid antibiotic                                                                                                     | antibiotic inactivation                                     | fosfomycin thiol transferase                               |
| <i>rpoB</i>   | rifamycin antibiotic                                                                                                           | antibiotic target alteration, antibiotic target replacement | rifamycin-resistant beta-subunit of RNA polymerase (rpoB)  |
| <i>msr(A)</i> | streptogramin antibiotic, macrolide antibiotic, streptogramin B antibiotic                                                     | antibiotic target protection                                | msr-type ABC-F protein                                     |
| <i>erm(A)</i> | streptogramin antibiotic, macrolide antibiotic, streptogramin B antibiotic, streptogramin A antibiotic, lincosamide antibiotic | antibiotic target alteration                                | Erm 23S ribosomal RNA methyltransferase                    |
| <i>erm(C)</i> | streptogramin antibiotic, macrolide antibiotic, streptogramin B antibiotic, streptogramin A antibiotic, lincosamide antibiotic | antibiotic target alteration                                | Erm 23S ribosomal RNA methyltransferase                    |
| <i>erm(B)</i> | streptogramin antibiotic, macrolide antibiotic, streptogramin B antibiotic, streptogramin A antibiotic                         | antibiotic target alteration                                | Erm 23S ribosomal RNA methyltransferase                    |

|                 |                                                                                                                                               |                              |                                                               |
|-----------------|-----------------------------------------------------------------------------------------------------------------------------------------------|------------------------------|---------------------------------------------------------------|
|                 | antibiotic, lincosamide<br>antibiotic                                                                                                         |                              |                                                               |
| <i>vga(A)</i>   | streptogramin<br>antibiotic, streptogramin<br>A<br>antibiotic, lincosamide<br>antibiotic, pleuromutilin<br>antibiotic                         | antibiotic target protection | vga-type ABC-F protein                                        |
| <i>erm(T)</i>   | streptogramin<br>antibiotic, streptogramin<br>B antibiotic, macrolide<br>antibiotic, lincosamide<br>antibiotic, streptogramin<br>A antibiotic | antibiotic target alteration | Erm 23S ribosomal RNA<br>methyltransferase                    |
| <i>tet (38)</i> | tetracycline antibiotic                                                                                                                       | antibiotic efflux            | major facilitator superfamily (MFS)<br>antibiotic efflux pump |
| <i>Tet(K)</i>   | tetracycline antibiotic                                                                                                                       | antibiotic efflux            | major facilitator superfamily (MFS)<br>antibiotic efflux pump |
| <i>tet(M)</i>   | tetracycline antibiotic                                                                                                                       | antibiotic target protection | tetracycline-resistant ribosomal<br>protection protein        |
| <i>tet(L)</i>   | tetracycline antibiotic                                                                                                                       | antibiotic efflux            | major facilitator superfamily (MFS)<br>antibiotic efflux pump |
| <i>tet(C)</i>   | tetracycline antibiotic                                                                                                                       | antibiotic efflux            | major facilitator superfamily (MFS)<br>antibiotic efflux pump |
| <i>mepA</i>     | tetracycline<br>antibiotic, glycylcycline                                                                                                     | antibiotic efflux            | multidrug and toxic compound<br>extrusion (MATE) transporter  |
